# Supplementary material for: Evaluation of the international standardized 24-h dietary recall methodology (GloboDiet) for potential application in research and surveillance within African settings
Source: PubMed Central journal article supplement (PMC5477249; doi:10.1186/s12992-017-0260-6), 2017-06-19
Supplement: 12992_2017_260_MOESM2_ESM.pdf [file 12992_2017_260_MOESM2_ESM.pdf]

## EVALUATION OF THE GLOBODIET BY AFRICAN EXPERTS

| Identification                                                                                                                                                                                                                                                                                                                                                                     |                                                                                                        |
|------------------------------------------------------------------------------------------------------------------------------------------------------------------------------------------------------------------------------------------------------------------------------------------------------------------------------------------------------------------------------------|--------------------------------------------------------------------------------------------------------|
| First name:<br>Family name:<br><i>The above information will not be computerized</i><br><br>1. Institution:<br><br><br><br><br><br><br><br>2. Country:<br>3. WHO region:<br><input type="checkbox"/> <sub>1</sub> EMRO <input type="checkbox"/> <sub>2</sub> AFRO-West<br><input type="checkbox"/> <sub>3</sub> AFRO-central <input type="checkbox"/> <sub>4</sub> AFRO-East-South | Participant ID<br><i>do not fill this box</i><br><br> _ _ _ _ <br><br> _ <br><br><br><br> _ <br><br> _ |
| Socio demographic information                                                                                                                                                                                                                                                                                                                                                      |                                                                                                        |
| 4. Gender<br><input type="checkbox"/> <sub>1</sub> Male <input type="checkbox"/> <sub>2</sub> Female                                                                                                                                                                                                                                                                               | _                                                                                                      |
| 5. Age group<br><input type="checkbox"/> <sub>1</sub> 20-29 <input type="checkbox"/> <sub>2</sub> 30-39 <input type="checkbox"/> <sub>3</sub> 40-49<br><input type="checkbox"/> <sub>4</sub> 50-59 <input type="checkbox"/> <sub>5</sub> ≥60                                                                                                                                       | _                                                                                                      |
| 6. Education:<br><input type="checkbox"/> <sub>1</sub> A level <input type="checkbox"/> <sub>2</sub> BSc or equivalent <input type="checkbox"/> <sub>3</sub> MSc or equivalent<br><input type="checkbox"/> <sub>4</sub> PhD                                                                                                                                                        | _                                                                                                      |
| 7. Occupation :                                                                                                                                                                                                                                                                                                                                                                    | _                                                                                                      |
| 8. What kind of dietary methods are you familiar with (in the sense of previously used)?<br><input type="checkbox"/> <sub>1</sub> 24 h dietary recall <input type="checkbox"/> <sub>2</sub> FFQ <input type="checkbox"/> <sub>3</sub> dietary records<br><input type="checkbox"/> <sub>4</sub> dietary history                                                                     | _                                                                                                      |
| 9. For the dietary methods you are familiar with, what was the main support?<br><input type="checkbox"/> <sub>1</sub> paper <input type="checkbox"/> <sub>2</sub> computer <input type="checkbox"/> <sub>3</sub> Internet<br><input type="checkbox"/> <sub>4</sub> tablet computer                                                                                                 | _                                                                                                      |

**General information**

10. What do you think about the general information section?

11. Is there any additional information that you think would be relevant to add?

**Quick list**

12. What do you think about the quick list section?

13. Are there any changes you could think of to improve this section?

14. Are there any needed changes to adapt the quick list to African settings you could think of?

| Description and Quantification                                                                                                                                                                                              |                                       |                                       |                                       |                                       |                                                                                                              |
|-----------------------------------------------------------------------------------------------------------------------------------------------------------------------------------------------------------------------------|---------------------------------------|---------------------------------------|---------------------------------------|---------------------------------------|--------------------------------------------------------------------------------------------------------------|
| 15. What do you think about the food description?                                                                                                                                                                           |                                       |                                       |                                       |                                       | <input type="checkbox"/><br><input type="checkbox"/><br><input type="checkbox"/><br><input type="checkbox"/> |
| 16. Is the food description adapted to African context?<br><input type="checkbox"/> <sub>0</sub> No <input type="checkbox"/> <sub>1</sub> Yes<br><br><b>If no</b> , could you specify why?                                  |                                       |                                       |                                       |                                       | <input type="checkbox"/><br><input type="checkbox"/><br><input type="checkbox"/>                             |
| 17. Is there any missing food description that would be relevant for African context?<br><input type="checkbox"/> <sub>0</sub> No <input type="checkbox"/> <sub>1</sub> Yes<br><br><b>If yes</b> , could you specify?       |                                       |                                       |                                       |                                       | <input type="checkbox"/><br><input type="checkbox"/><br><input type="checkbox"/>                             |
| 18. Are there any facet descriptors that are not relevant to African context?<br><input type="checkbox"/> <sub>0</sub> No <input type="checkbox"/> <sub>1</sub> Yes<br><br><b>If no</b> , could you specify why?            |                                       |                                       |                                       |                                       | <input type="checkbox"/><br><input type="checkbox"/><br><input type="checkbox"/>                             |
| 19. Are there any missing facet descriptors that would be relevant for the African context?<br><input type="checkbox"/> <sub>0</sub> No <input type="checkbox"/> <sub>1</sub> Yes<br><br><b>If yes</b> , could you specify? |                                       |                                       |                                       |                                       | <input type="checkbox"/><br><input type="checkbox"/><br><input type="checkbox"/>                             |
| 20. How do you evaluate the <b>pictures of foods for the face-to-face interviews</b> ? It is:                                                                                                                               |                                       |                                       |                                       |                                       |                                                                                                              |
|                                                                                                                                                                                                                             | Strongly agree                        | Agree                                 | Neither agree nor disagree            | Disagree                              | Strongly disagree                                                                                            |
| convenient to use                                                                                                                                                                                                           | <input type="checkbox"/> <sub>1</sub> | <input type="checkbox"/> <sub>2</sub> | <input type="checkbox"/> <sub>3</sub> | <input type="checkbox"/> <sub>4</sub> | <input type="checkbox"/> <sub>5</sub>                                                                        |
| applicable for use in African settings                                                                                                                                                                                      | <input type="checkbox"/> <sub>1</sub> | <input type="checkbox"/> <sub>2</sub> | <input type="checkbox"/> <sub>3</sub> | <input type="checkbox"/> <sub>4</sub> | <input type="checkbox"/> <sub>5</sub>                                                                        |
| 21. If you think the <b>pictures of foods</b> are not applicable for use in Africa, could you specify why?                                                                                                                  |                                       |                                       |                                       |                                       | <input type="checkbox"/><br><input type="checkbox"/>                                                         |

|                                                                                                                                                                                           |                                       |                                       |                                       |                                       |                                       |                 |
|-------------------------------------------------------------------------------------------------------------------------------------------------------------------------------------------|---------------------------------------|---------------------------------------|---------------------------------------|---------------------------------------|---------------------------------------|-----------------|
|                                                                                                                                                                                           |                                       |                                       |                                       |                                       |                                       | _               |
| 22. Which adaptations of the <b>pictures of foods</b> could you think of to make it more suitable for African settings?                                                                   |                                       |                                       |                                       |                                       |                                       | _ <br> _ <br> _ |
| 23. How do you evaluate the <b>pictures of household measures for the face-to-face interviews?</b> It is:                                                                                 |                                       |                                       |                                       |                                       |                                       |                 |
|                                                                                                                                                                                           | Strongly agree                        | Agree                                 | Neither agree nor disagree            | Disagree                              | Strongly disagree                     |                 |
| convenient to use                                                                                                                                                                         | <input type="checkbox"/> <sub>1</sub> | <input type="checkbox"/> <sub>2</sub> | <input type="checkbox"/> <sub>3</sub> | <input type="checkbox"/> <sub>4</sub> | <input type="checkbox"/> <sub>5</sub> |                 |
| applicable for use in African settings                                                                                                                                                    | <input type="checkbox"/> <sub>1</sub> | <input type="checkbox"/> <sub>2</sub> | <input type="checkbox"/> <sub>3</sub> | <input type="checkbox"/> <sub>4</sub> | <input type="checkbox"/> <sub>5</sub> |                 |
| 24. If you think the <b>pictures of household measures</b> are not applicable for use in Africa, could you specify why?                                                                   |                                       |                                       |                                       |                                       |                                       | _ <br> _ <br> _ |
| 25. Which adaptations of the <b>pictures of household measures</b> could you think of to make it more suitable for African settings?                                                      |                                       |                                       |                                       |                                       |                                       | _ <br> _ <br> _ |
| 26. How do you evaluate the <b>shape quantification method for the face-to-face interviews?</b> It is:                                                                                    |                                       |                                       |                                       |                                       |                                       |                 |
|                                                                                                                                                                                           | Strongly agree                        | Agree                                 | Neither agree nor disagree            | Disagree                              | Strongly disagree                     |                 |
| convenient to use                                                                                                                                                                         | <input type="checkbox"/> <sub>1</sub> | <input type="checkbox"/> <sub>2</sub> | <input type="checkbox"/> <sub>3</sub> | <input type="checkbox"/> <sub>4</sub> | <input type="checkbox"/> <sub>5</sub> |                 |
| applicable for use in African settings                                                                                                                                                    | <input type="checkbox"/> <sub>1</sub> | <input type="checkbox"/> <sub>2</sub> | <input type="checkbox"/> <sub>3</sub> | <input type="checkbox"/> <sub>4</sub> | <input type="checkbox"/> <sub>5</sub> |                 |
| 27. If you think the <b>shape quantification method</b> is not applicable for use in Africa, could you please specify why?                                                                |                                       |                                       |                                       |                                       |                                       | _ <br> _ <br> _ |
| 28. How do you evaluate the <b>use of standard units</b> (e.g one banana, one can, one bag of potato chips,...) <b>as a quantification method for the face-to-face interviews?</b> It is: |                                       |                                       |                                       |                                       |                                       |                 |
|                                                                                                                                                                                           | Strongly agree                        | Agree                                 | Neither agree nor disagree            | Disagree                              | Strongly disagree                     |                 |
| convenient to use                                                                                                                                                                         | <input type="checkbox"/> <sub>1</sub> | <input type="checkbox"/> <sub>2</sub> | <input type="checkbox"/> <sub>3</sub> | <input type="checkbox"/> <sub>4</sub> | <input type="checkbox"/> <sub>5</sub> |                 |
| applicable for use in African settings                                                                                                                                                    | <input type="checkbox"/> <sub>1</sub> | <input type="checkbox"/> <sub>2</sub> | <input type="checkbox"/> <sub>3</sub> | <input type="checkbox"/> <sub>4</sub> | <input type="checkbox"/> <sub>5</sub> |                 |
| 29. If you think the <b>standard units quantification method</b> is not applicable for use in Africa, could you please specify why?                                                       |                                       |                                       |                                       |                                       |                                       | _ <br> _        |

|                                                                                                                                                                                                                                                                                                  |                 |
|--------------------------------------------------------------------------------------------------------------------------------------------------------------------------------------------------------------------------------------------------------------------------------------------------|-----------------|
|                                                                                                                                                                                                                                                                                                  | _               |
| <p>30. Are there any other methods of quantification used or relevant in African settings that are not taken into account by GloboDiet software?</p> <p><input type="checkbox"/><sub>0</sub> No                      <input type="checkbox"/><sub>1</sub> Yes</p> <p>If yes, please specify:</p> | _ <br> _ <br> _ |

| <b>Overall controls</b>                                          |                 |
|------------------------------------------------------------------|-----------------|
| <p>31. What do you think about the overall controls section?</p> | _ <br> _ <br> _ |
| <p>32. What do you think about the probing questions?</p>        | _ <br> _ <br> _ |

**Dietary supplements**

33. What do you think about the dietary supplement section?

|\_ |

|\_ |

|\_ |

| Overall evaluation of the software                                                                                                        |                                       |                                       |                                       |                                       |                                       |
|-------------------------------------------------------------------------------------------------------------------------------------------|---------------------------------------|---------------------------------------|---------------------------------------|---------------------------------------|---------------------------------------|
| 1. How do you evaluate realization of the <b>face-to-face computerized 24-h dietary recalls</b> ? Do you think it is:                     |                                       |                                       |                                       |                                       |                                       |
|                                                                                                                                           | Strongly agree                        | Agree                                 | Neither agree nor disagree            | Disagree                              | Strongly disagree                     |
| feasible                                                                                                                                  | <input type="checkbox"/> <sub>1</sub> | <input type="checkbox"/> <sub>2</sub> | <input type="checkbox"/> <sub>3</sub> | <input type="checkbox"/> <sub>4</sub> | <input type="checkbox"/> <sub>5</sub> |
| convenient                                                                                                                                | <input type="checkbox"/> <sub>1</sub> | <input type="checkbox"/> <sub>2</sub> | <input type="checkbox"/> <sub>3</sub> | <input type="checkbox"/> <sub>4</sub> | <input type="checkbox"/> <sub>5</sub> |
| efficient                                                                                                                                 | <input type="checkbox"/> <sub>1</sub> | <input type="checkbox"/> <sub>2</sub> | <input type="checkbox"/> <sub>3</sub> | <input type="checkbox"/> <sub>4</sub> | <input type="checkbox"/> <sub>5</sub> |
| acceptable time load                                                                                                                      | <input type="checkbox"/> <sub>1</sub> | <input type="checkbox"/> <sub>2</sub> | <input type="checkbox"/> <sub>3</sub> | <input type="checkbox"/> <sub>4</sub> | <input type="checkbox"/> <sub>5</sub> |
| not adapted to African settings                                                                                                           | <input type="checkbox"/> <sub>1</sub> | <input type="checkbox"/> <sub>2</sub> | <input type="checkbox"/> <sub>3</sub> | <input type="checkbox"/> <sub>4</sub> | <input type="checkbox"/> <sub>5</sub> |
| 2. If you think the face-to-face interview is not adapted to the African settings, could you please specify why:                          |                                       |                                       |                                       |                                       | <input type="text"/>                  |
|                                                                                                                                           |                                       |                                       |                                       |                                       | <input type="text"/>                  |
|                                                                                                                                           |                                       |                                       |                                       |                                       | <input type="text"/>                  |
| 3. How do you evaluate the use of the <b>data entry application</b> (using food diary) for young children and elders? Do you think it is: |                                       |                                       |                                       |                                       |                                       |
|                                                                                                                                           | Strongly agree                        | Agree                                 | Neither agree nor disagree            | Disagree                              | Strongly disagree                     |
| feasible                                                                                                                                  | <input type="checkbox"/> <sub>1</sub> | <input type="checkbox"/> <sub>2</sub> | <input type="checkbox"/> <sub>3</sub> | <input type="checkbox"/> <sub>4</sub> | <input type="checkbox"/> <sub>5</sub> |
| convenient                                                                                                                                | <input type="checkbox"/> <sub>1</sub> | <input type="checkbox"/> <sub>2</sub> | <input type="checkbox"/> <sub>3</sub> | <input type="checkbox"/> <sub>4</sub> | <input type="checkbox"/> <sub>5</sub> |
| efficient                                                                                                                                 | <input type="checkbox"/> <sub>1</sub> | <input type="checkbox"/> <sub>2</sub> | <input type="checkbox"/> <sub>3</sub> | <input type="checkbox"/> <sub>4</sub> | <input type="checkbox"/> <sub>5</sub> |
| acceptable time load                                                                                                                      | <input type="checkbox"/> <sub>1</sub> | <input type="checkbox"/> <sub>2</sub> | <input type="checkbox"/> <sub>3</sub> | <input type="checkbox"/> <sub>4</sub> | <input type="checkbox"/> <sub>5</sub> |
| not adapted to African settings                                                                                                           | <input type="checkbox"/> <sub>1</sub> | <input type="checkbox"/> <sub>2</sub> | <input type="checkbox"/> <sub>3</sub> | <input type="checkbox"/> <sub>4</sub> | <input type="checkbox"/> <sub>5</sub> |
| 4. If you think the face-to-face interview is not adapted to the African settings, could you please specify why:                          |                                       |                                       |                                       |                                       | <input type="text"/>                  |
|                                                                                                                                           |                                       |                                       |                                       |                                       | <input type="text"/>                  |
|                                                                                                                                           |                                       |                                       |                                       |                                       | <input type="text"/>                  |
| 5. How do you evaluate the <b>GloboDiet 24-h dietary recall software for performing 24-h dietary recalls</b> ? It is:                     |                                       |                                       |                                       |                                       |                                       |
|                                                                                                                                           | Strongly agree                        | Agree                                 | Neither agree nor disagree            | Disagree                              | Strongly disagree                     |
| user-friendly                                                                                                                             | <input type="checkbox"/> <sub>1</sub> | <input type="checkbox"/> <sub>2</sub> | <input type="checkbox"/> <sub>3</sub> | <input type="checkbox"/> <sub>4</sub> | <input type="checkbox"/> <sub>5</sub> |
| understandable                                                                                                                            | <input type="checkbox"/> <sub>1</sub> | <input type="checkbox"/> <sub>2</sub> | <input type="checkbox"/> <sub>3</sub> | <input type="checkbox"/> <sub>4</sub> | <input type="checkbox"/> <sub>5</sub> |
| complete                                                                                                                                  | <input type="checkbox"/> <sub>1</sub> | <input type="checkbox"/> <sub>2</sub> | <input type="checkbox"/> <sub>3</sub> | <input type="checkbox"/> <sub>4</sub> | <input type="checkbox"/> <sub>5</sub> |
| complex                                                                                                                                   | <input type="checkbox"/> <sub>1</sub> | <input type="checkbox"/> <sub>2</sub> | <input type="checkbox"/> <sub>3</sub> | <input type="checkbox"/> <sub>4</sub> | <input type="checkbox"/> <sub>5</sub> |
| not adapted to African settings                                                                                                           | <input type="checkbox"/> <sub>1</sub> | <input type="checkbox"/> <sub>2</sub> | <input type="checkbox"/> <sub>3</sub> | <input type="checkbox"/> <sub>4</sub> | <input type="checkbox"/> <sub>5</sub> |
| 6. If you think the software is not adapted to African settings, could you please specify why:                                            |                                       |                                       |                                       |                                       | <input type="text"/>                  |
|                                                                                                                                           |                                       |                                       |                                       |                                       | <input type="text"/>                  |

|                                                                                                                |                             |                             |                             |                             |                             |
|----------------------------------------------------------------------------------------------------------------|-----------------------------|-----------------------------|-----------------------------|-----------------------------|-----------------------------|
|                                                                                                                |                             |                             |                             |                             | _                           |
| 7. How do you evaluate the use of a computer-based interview performed by an interviewer?                      |                             |                             |                             |                             |                             |
|                                                                                                                | Strongly agree              | Agree                       | Neither agree nor disagree  | Disagree                    | Strongly disagree           |
| feasible                                                                                                       | <input type="checkbox"/> _1 | <input type="checkbox"/> _2 | <input type="checkbox"/> _3 | <input type="checkbox"/> _4 | <input type="checkbox"/> _5 |
| convenient                                                                                                     | <input type="checkbox"/> _1 | <input type="checkbox"/> _2 | <input type="checkbox"/> _3 | <input type="checkbox"/> _4 | <input type="checkbox"/> _5 |
| adapted to African settings                                                                                    | <input type="checkbox"/> _1 | <input type="checkbox"/> _2 | <input type="checkbox"/> _3 | <input type="checkbox"/> _4 | <input type="checkbox"/> _5 |
| 8. If you think the computer-based interview is not adapted to African settings, could you please precise why: |                             |                             |                             |                             | _                           |
|                                                                                                                |                             |                             |                             |                             | _                           |
|                                                                                                                |                             |                             |                             |                             | _                           |
