# Supplementary material for: Evaluation of the international standardized 24-h dietary recall methodology (GloboDiet) for potential application in research and surveillance within African settings
Source: Global Health. 2017 Jun 19;13:35. doi: 10.1186/s12992-017-0260-6 (PMC5477249; doi:10.1186/s12992-017-0260-6)
Supplement: Supplementary file 1 — Answers of the e-questionnaire by the experts panel. (XLSX 46 kb) [file 12992_2017_260_MOESM1_ESM.xlsx]

## Sheet: GLOBODIET__20151006
Code	Preworkshop		Information on the experts								Dietary methods used				Main support	Opinion general information		Quick list			Food description									Picture books				Household measurements				Shape quantification			Standards units			Other quantification		Probing and controls		Dietary suplements	24h computerized recall
expertid	preworkshopcomments	preworkshopquestions	institution	country	whoregion	other	sex	agegroup	educationlevel	occupation	24h	FFQ	Dietary recall	History	dietarysupport	opiniongi	adinfogi	opinionql	improvql	adaptql	opinionfd	adaptedfd	wadaptedfd	missingfd	wmissingfd	relevantfd	wrelevantfd	addingfd	waddingfd	convenientpb	applicablepb	wapplicablepb	adaptationpb	convenienthm	applicablehm	wapplicablehm	adaptationhm	convenientsq	applicablesq	wapplicablesq	convenientsu	applicablesu	wapplicablesu	otherquantif	wotherquantif	controls	probing	dietarysuppl	feasibility
502	Outil très bien conçu, démarche méthodologique très élaborée. L?utilisation correcte de cet outil pour l?évaluation de la consommation alimentaire réduirait au mieux les biais connus (désirabilité et oubli) au regard de toutes les étapes prévues pour le déroulement de l?interview (liste rapide, liste détaillée avec des précisions d?horaire, possibilité d?incorporer de nouvelles recettes, étape de…	Des travaux préalables à la contextualisation de l?outil en Afrique sont obligatoires ou doivent être menés parallèlement. 1) Une table de composition des aliments pour l?Afrique (il existe déjà une table pour l?Afrique de l?Ouest). Les habitudes alimentaires sont différentes d?une région de l?Afrique à une autre. 2) Un inventaire par pays des recettes alimentaires utilisées en Afrique nous sembl…	Université d'Abomey-Calavi/ Faculté des Sciences de la Santé/ Ecole de Nutrition et Diététique	Bénin	AFRO-West		Female	30-39	PhD	Enseignement et recherche/ Coordonnatrice Ecole de Nutrition et Diététique-FSS/UAC	1	1	1		Paper	Cette partie prend en compte toutes les informations nécessaires. On pourrait intégrer quelques questions brèves (qualitatives) pour avoir une idée du niveau socio-économique du sujet, ou sur son mode et style de vie (activité physique et tabac alcool): intérêts clinique et épidémiologique	Déjà mentionné	Parfait (rien à ajouter)	No	No	Contextualisation nécessaire ( déjà mentionné avant l'atelier)	No	Les images d'aliments incorporés dans le logiciel doivent être le plus proche des réalités africaines. Ce qui n'est pas le cas actuellement. Les images doivent tenir compte des representations socio-culturelles	Yes	La liste des aliments par un inventaire de l'existant par region et par pays. On ne peut tout lister ici	No		Yes	Avec l'inventaire des recettes on pourra faire une mise à jour de ces facettes	Agree	Agree		Tenir compte des representations socio-culturelles et des habitudes alimentaires africaines	Agree	Agree	Il y a des instruments dans globodiet qui ne sont pas adaptés à certaines cultures	C'est applicable pour les populations instruites, mais il faut qu'on recherche localement des instruments correspondant pour les populations analphabètes	Strongly agree	Strongly agree		Strongly agree	Strongly agree		No		Très important	Très pertinent	Bien élaboré	Strongly agree
603	Having gone through the video presentation and the power point presentation, I believe it is a major improvement on the manual tools used I the past. It holds opportunity to reduce the errors in applying 24HDR from different researchers. I think it is a major progress.	Major concern for me is whether the different preparation methods of the food items have been fully factored. Steaming may be differently applied in different African setting based on the cultural differences. Changing from one interface to the other appear cumbersome. Can this be improved?	DietPlus Ghana	Ghana	AFRO-West		Male	30-39	MSc or equivalent	Registered dietician	1	1	1	1	Paper	It contains vital basic information about any respondent	I think adding the occupation of the respondent could give information about what further questions to ask.	The vital aspects are covered	May be it will be crucial to add the preparatory methods.	I think preparatory method is important since that can change the nutrient availability.	The relevant aspects are covered	Yes		No		No		No		Agree	Agree		Am wondering if it will be possible to consider the rural folks who may not use standard measuring items if they will be able to relate with some of the photos. For the African context, it will be appropriate to take into consideration the local measuring items. For example, calabash is used in Ghana as a measuring item of liquid nature. May be, it will be useful to show such similarities with st…	Agree	Agree			Agree	Agree		Agree	Agree		No		Very relevant for the dietary assessment	Very useful	Very relevant because dietary supplements are now widely consumed in African settings as well.	Strongly agree
403	It is a very comprehensive methodology	There are a few clarifications needed on the use of local food composition databases	University of Ghana	Ghana	AFRO-West		Male	30-39	PhD	Snr. Lecturer	1	1			Paper	Very useful	N/A	It makes it easy for quick references	No	No	It is very detailed	Yes		No		No		No		Strongly agree	Agree	N/A	N/A	Strongly agree	Strongly agree	N/A	N/A	Strongly agree	Agree	N/A	Strongly agree	Strongly agree	N/A	No		Really needed	Very critical in ensuring the right inputs are made		Strongly agree
601	This is a good method that your proposing. It minimizes on errors and biases and it is time efficient in collecting precise information	It is applicability in Africa will be a challenge because advanced ICT and computer literacy levels are still low. Most highly educated persons in Africa have basic knowledge about ICT	Makerere University	Uganda	AFRO-East-South		Male	30-39	MSc or equivalent	PhD Student	1	1			Paper	It appears the caution regarding weight is eurocentric. However, generally in Africa, being overweight is a sign of being healthy and wealthy.	In rural africa, because of low literacy and education levels, for age, we need to allow the respondents to consult hospital birth certificates. Also, when noting dates of birth, if records are not available lets allow the respondents to mention the major village, national event (eg major hunger, civil war, floods etc) that occurred during their birth. That way we can estimate the right age of th…	It is comprehensive!	None	Yes! The place of consumption, would be perfectly be captured when associate with household economioc activities. For example during hunting and farming, parents and children snack a lot, on raw fruits and foods.	It appears comprehensive	Yes		No		No		No		Neither agree nor disagree	Neither agree nor disagree	In Africa, most households consume food as a group, and they eat from one locally fabricated containers. glass or ceramic food containers are not applicable in most African settings. We use metallic or plastic items and all family members.	There is need to first conduct a rapid appraisal of local utensils commonly used for food consumption in the study area	Neither agree nor disagree	Neither agree nor disagree	Some elite households in urban centers use this utensils. While in the rural settings use other locally available utensils	This is subjective. Each region, country has it is own utensils that they have adapted. This calls for first conducting a mapping study with key informants to document pictures of household measures. For example in Uganda, they use a calabash to consume porridge, while in Cameroon some communities use local utensils refereed to as combos!	Neither agree nor disagree	Neither agree nor disagree	Africans both rural and urban consume many types of locally produced foods, shaped in different forms	Neither agree nor disagree	Neither agree nor disagree	The standard units need to be adapted to the local context, because the utensils used in rural African settings are not standardized. Secondly there is alot of communal feeding in Africa, unlike the individual feeding practices among the elites	Yes	Sometimes actual weighing of foods, may be needed!	I see a challenge of over estimating the quantities consumed, because respondents feeding communally from one plat, may not be in position to give accurate measurements!	There is need to have questions on special foods, such as wild, forest foods...	This is fine. However note that in rural African supplements are consumed in very low levels and among some sections of individuals such as the pregnant	Strongly agree
303	I am new to this methodology and do not have knowledge about it although I have seen in in some studies.		University of Botswana	Botswana	AFRO-East-South		Female	50-59	PhD	Lecturer, Human Nutrition & Extension	1	1			Paper	The general information is fine except the issue of self reported height and weight. I am not sure if most of the respondents in my country will have that information easily.	I cannot think of any	The quick list section is fine as it is following standard procedure of asking what the client ate, when and where.	How one capture issues like travel dates being special? Would stating a day different from your usual or unsual day be also a possibility?	Given that the quick list is really a listing of foods eaten by the client, I believe it is OK.	I do not have a problem with the kind/type of food consumed. But I would change the question regarding the cup to which type of cup did you use and then use the pictures provided to help answer the questions. Brand names would also have to be modified to suit the specific country/region. The challenges that I foresee are as follows: 1. Calibration of utensils, each country would have to do its ow…	Yes		Yes	Wild fruits and vegetables which might be seasonal	No		Yes	Food Preparation/purchase could have a descriptor that shows that the food is a wild vegetable or fruit.	Strongly agree	Strongly agree		make them real life size	Strongly agree	Strongly agree		Make the pictures real life probably 3D instead of flat making one unable to determine the correct type and quantity	Strongly agree	Agree	where is the circular shape?	Strongly agree	Strongly agree	As previously mentioned. The type of utensils used might have to be modified to suit the country/region and not that it is not applicable	No		I am fine with neutral controls used that do not lead the interviewee	These too are just fine and adequate	It is also OK. But, some people might be taking these supplements but thinking of them as medication. There is a lot of supplements sold through pyramid scheme and one wonders whether people consider these as supplements or medication.	Strongly agree
203			Université de Douala - faculté des Sciences	Cameroun	AFRO-central		Male	50-59	PhD	Enseignant Chercheur	1				Paper	Applicable selon une adaptation locale	intégrer les tabous alimentaires et les aliments traditionnels	Elle est bonne, mais doit être adapter par région en fonction des habitudes et cultures	Oui mettre par région - religion _- culture	Oui il faut creer les entrées	elle est bonne mais non adaptée au contexte africain, nécessite une prise en compte des menus africains, parfois traditionnels	No	Les ingredients, les méthodes culinéaires et le matériel de cuisson sont différents	Yes	Séchage au soleil, le fumage, piler au mortier	Yes	les méthodes culinéaires n'emploient pas beaucoup les balances, les mesurettes, etc	Yes	essorage, moudre, tamiser, écraser à la pierre, piler au mortier	Agree	Agree	Souvent les gens consomment entierement leur repas, mais on peut adapter au genre de menu	utiliser les ustensiles usuelles en afrique	Agree	Agree		aux instruments usuels à adapter et à quantifier et qualifier ou standardiser sur le terrain	Agree	Neither agree nor disagree	Une portion pourrait avoir la même forme bien qu'étant trop petite pour le poids connu	Agree	Neither agree nor disagree	Il faut toujours standardiser car il y a par exemple plusieurs type de banane	Yes	Rotis au four, à la cendre chaude, au grillage	bonne	bonne	adapter au contexte africain	Strongly agree
401			FAO Head Quarters	Global institution			Female	50-59	PhD	Nutrition Offficer						Too much focus on non communicable diseases whereas nutrition deficiency is still a major problem in Africa						No								Neither agree nor disagree	Disagree	in rural settings, people are not used to see pictures		Neither agree nor disagree	Disagree	there is a high variability in household measures in rural areas	if the survey is performed at home the cups used at household level could be meaured (by weighing the water they can contain) and used to assess quantities	Neither agree nor disagree	Disagree	capacity of subjects to conceptualize may not be sufficient	Strongly agree	Strongly agree							Agree
606		Sorry I did not fill this out before the workshop.	Friedman School of Nutrition Science and Policy, Tufts University	United States		USA	Female	30-39	MSc or equivalent	Assistant Researcher	1					I agree with the types of data collected in the general information section.	Depending on the purposes of administering the 24-hour recall, it may be useful to also ask whether female respondents are pregnant or breastfeeding.	It appears to have a number of useful features (ability to define at project level the food consumption occasions and places of consumption).	No.	No.	The facet/descriptor approach is an interesting way to standardize the interview format. Some of the facets are clearly more relevant to contexts such as Europe where the food system is highly industrialized and food products available are more processed (e.g., packing medium, fat content). These could be relevant in urban centres of more developed countries in Africa but less so in rural, low in…	Yes				Yes	If you are dealing with rural settings where the food supply does not include very processed foods then facets like fat content, sugar content, and packing medium will likely be less applicable.			Neither agree nor disagree	Neither agree nor disagree	There is very little validation literature available on use of pictures as portion size estimation aids in low income countries. In a recent review on portion size estimation aids that was conducted by INDDEX, it was found that pictorial literacy was a concern and one that hasn't been explored in research very much to date.	Perhaps consider using other portion size estimation aids commonly used in dietary studies in low income settings: food models, salted replicas, household items.	Agree	Neither agree nor disagree	I think using pictures of household measures is convenient but the household measures themselves would need to be adapted to an African context. The glasses and mugs used in the pictures presented in the GloboDiet are different from what you would find in a household of an individual living in a low income, rural area.	The household measures themselves would have to be adapted to the specific country context.	Agree	Neither agree nor disagree	I think the line drawings of shapes could be applicable. I think the shape fraction method will be very difficult for a person with limited literacy and education to understand.	Agree	Agree		Yes	Use of real foods or salted replicas, molding clay (see Rosalind Gibson and Elaine Ferguson's Interactive 24- hour recall manual for low income countries. A number of different quantification methods are listed here).	The controls seem useful and adequate.	The neutral probing questions seem useful and appropriate.	From what I could tell this section is useful and contains relevant facets and descriptors.	Strongly agree
402	Very comprehensive and easy to adapt and the trend of questions directed to the interviewee is not intrusive other than collection of accurate data on what was consumed. The nature of the pattern of steps that was applied in gathering information of foods eaten definitely yields what interviewer needed to know.	No issues	University of Health and Allied Sciences	Ghana	AFRO-West		Male	50-59	PhD or MD	University Lecturer	1	1	1	1	Paper	The general information provided is comprehensive and easy to understand.	None	This was comprehensive	There will certainly be changes within the African context as recipes are vastly different in certain respects	Both the food and the recipe pathways, however, this will not be too much other than adding the different foods to the list that can be called upon during interviews	Very clear and allows the interviewee to know exactly what is being requested to give a true answer without any doubt	Yes		Yes	African foods and recipes needed to be added to list	No		No		Strongly agree	Strongly agree		All the pictures are relevant but will also need more pictures of local foods as the nutrition transition has proliferated into our diets and so these foods as listed are also eaten by some individuals.	Strongly agree	Strongly agree		bowls and cups which ascertains quantities of portions eaten. Also weights have been easily quantified irrespective of food type so can be adapted	Strongly agree	Strongly agree		Strongly agree	Strongly agree		No		Very easy to use in any setting and adaptable	Probing questions were very much appropriate and interviewer was not intrusive and her voice was well measured and relaxing for the interviewer to volunteer information	had a comprehensive list of supplements in use, however room should be made for any African supplements not captured	Strongly agree
103	The method is similar to the five pass 24HR method by Gibson and others. it is fascinating on how it reduces the paper work associated with the Gibson et al method and how easy data analysis is deemed to become with this method.	I appreciate that the tool will be tailored for all the FAO regions, but it is worth noting that no 2 countries in Africa share the exact diet. the foods may be similar but the recipes are completely different. i bare in mind that there are no standard dietary guidelines developed for many African countries and therefore no complete food composition tables. this process may entail the developing …	University of Nottingham	United Kingdom	AFRO-East-South		Female	30-39	PhD or MD	PhD. Candidate	1	1	1	1	Paper	More information on the data entrant.	information about the tool user (data entrant) as this is bound to affect the in depth of probing and nature of responses the interviewee gives				current food description is tailored for the European consumer. bear in mind food labelling in not very commonly used for the African market and therefore consumers are ignorant about labels, therefore description may be based on their own preparation methods. further still the African food market tends to produce for a limited number of consumers mainly in the cities save for the condiment indus…	Yes		Yes	descriptions on food sources (own production, purchased, gift, donation etc )					Neither agree or disagree	Neither agree or disagree		foods should reflect the African diet (i know this is being processed). Methods of food serving in the African context eg plate sharing,	Agree	Neither agree or disagree		i think the general concept of using predefined cups and plates may not really be feasible. we could at some point go back to measuring from first principles using household cups and plates and calibrated cylinders and measuring scales in order to take the actual measurements.. this arises due ti the variations in the household utensils.	Neither agree or disagree	Neither agree or disagree		Disagree	Disagree	it is not common to come across packed foods prepacked and off the shelf. many people prepare food at home and measuring is not common place. those that can afford to buy pre packed food are high end consumers found in urban areas yet quite often data is collected from poor rural communities that can not afford to buy such pre packed, pre- measured foods. Further still, in my experience, the stan…	Yes	the use of the palm full as a measure of dry foods the use of fingers to scoop soft foods while eating, especially maize and millet products. it is common for people to consume say for instance a whole cluster of apple bananas, whole or half a jack fruit, a basket of mangoes etc as opposed to a single finger or fruit or two as with European consumers.		the probes are good for all setting. to some extent they are subjective. subject to who is probing and what training and familiarity one has with a particular method of food preparation.	it is necessary, but this will not apply to many consumers in rural areas. it also worth noting that some foods are fortified en mass like maize and wheat flour, cooking oil and sugar. it could be relavant to find out what brands were used in preparation of foods for the tool to capture information on mineral supplementation.	Agree
302	Having looked at the video demonstrating the methodology, it looks impressive. Having used the paper method to collect dietary data for many years, the computer based method definitely looks more sophisticated" and will save a lot of time in terms of dietary coding. Many respondents will however not be able to provide information as easily as the respondent in the video. "	To ensure that the data collection process has a relaxed participatory approach, it will be helpful if a variety of dietary assessment aids are used (not only pictures). E.g. is the respondent provided with a ruler to estimate the thickness of a food item? The specific time for a meal occasion is recorded; if respondents are not bale to a specific time, can this be left open [and only work with p…	South African Medical Research Council	South Africa			Female	50-59	PhD or MD	Researcher	1	1	1	1	Paper	When used in research projects, the name and surname of the respondent should not be captured (often an ethical requirement) There should be an option to skip the height and weight measurements as not all dietary surveys include height and weight measurements; when these measurements are taken, this is often done by different fieldworkers and recorded in a separate questionnaire (somewhere else).	Age of the respondent (in cases where birth date is not known) The term special day" can be misleading; whereas a birthday or wedding can be seen as a special day being sick or having no money for food cannot really be viewed as a special day; maybe rather ask whether the food that was eaten yesterday was typical of the usual food intake"	I assume it will be important for the interviewer to be familiar with the food list, as she needs to record the food item as in the food list	The food list should preferable include all possible names that can be used to describe the food item.	In the South African context, "juice" often refers to fruit juice as well as cordials. It would therefore help if there is a check to ensure that juice refers to fruit juice It may be difficult for some respondents to record a time for when the food was eaten Travelling could include "walking" as well; street foods and food vendors on the way to work / school (or will this fall under "outside"?) …	Brand name may be difficult to recall, as poor households often buy the special of the day In some cases a Brand name is used as food name (e.g. Danone is a synonym for yoghurt, regardless of the brand; Rama is a synonym of margarine/butter, regardless of the brand)									Strongly agree	Strongly agree		Pictures are very useful to identify specific details for a food e.g. margarine; often the respondent can distinguish between hard and soft margarine, but cannot provide more detailed information; showing them pictures of all the different types of margarine available, most find it easy to identify the one that they used When pictures of dished-up food is used, it is important that the plate/dish…	Neither agree or disagree	Disagree	Our experience is that rural respondents find it difficult to use pictures of household measures. In some cases we do use pictures; e.g. to describe the difference between a level and heaped spoon; or to show bread spread with margarine for scraped/thin, medium or thick; or to show the colour of tea/coffee with little, medium or lot of milk For the rest we find it easier to use actual spoons, cup…	Use actual utensils, rather than pictures. We will mark all the utensils with stickers, to ensure that the fieldworker records it correctly; we also use stickers to indicate difference levels of fullness of e.g. glass (as in the pictures, but we just use a real glass) We are currently collecting dietary data for babies in a community where baby foods are frequently eaten by 6-month old babies. We…	Neither agree or disagree	Disagree	Our experience is that rural respondents cannot relate pictures of shapes / fractions to food. It is probably better to use rulers, shapes made from foam etc	Agree	Disagree	Standard units can be used, as long as the units are adapted for the specific study population [our experience is that sometimes a small is sometimes the same size a the large in another community] For crisps e.g. it is helpful to have empty chip bags for all the different sizes that are available	Yes	The respondents can use e.g. dried oats / popcorn / cooked porridge to dish up the amount the resembles the amount of the food eaten, and this can then be quantified by the fieldworker using a measuring cup	Dietary intake within the African context can vary a lot; from a very low intake (maybe day before payday) or very high intake (special occasion); will the final check using macronutrient intake not create an opportunity to wrongfully revise the collected data to be more in line with expectations? If local people are trained as interviewers, will hey be able to do the final check bases on macronu…		Not all respondents will be able to provide this information It is not clear whether this sections includes dietary supplements that are used as food e.g. Ensure [I assume that this would have been recorded under the food list, and not under supplements]	Agree
506	Very good and helpful tool indeed but needs to adapt to Africa setting	I think that the french version of this software is available so, no issue in this option, but it seems that the questionnaire is very long to complete in field setting, how average time iw needed to complete it per person? it's my concern because the majority of our studies are runned on schools or health centers when time is very limiting ...	CNESTEN (Unité Mixte de Recherche en Nutrition et Alimentation, CNESTEN-Université Ibn Tofail)	Morocco	EMRO		Female	30-39	PhD or MD	researcher	1	1			Paper	very complete	no	no comments	no	I cannot check if the list is exhaustive or not for morocco	I will think that it will need to adapt as we don't have the same foods as europeens ( ex tagines...), not the same food habits...not the same brands, we must create a predifined country specific food or recipe list.	No	the main challenge with food quantification is that the majority of moroccan eat in the same plate which make the estimation of the portion consumed by a person very complicated and may affect the results.	Yes	i the actual globodiet is adapted for europeen so, food list, ingredients and recipes must be re- adapted to meet Africa setting					Agree	Neither agree or disagree		pictures of foods are very helpful but needs to be adapted you must think maybe to elaborate a BOOK OF COLORED PICTURES common accross african countries (or who are very similar)	Strongly agree	Neither agree or disagree		people here are more using another types of glasses to drink tea, water or coffee so pictures needs to be adapted.	Strongly agree	Neither agree or disagree		Agree	Agree		No		good, helpful	good	good	Agree
201	Je ne connais pas la méthodologie du GloboDiet. il est donc impossible pour moi de faire des commentaires	Cependant j'ai besoin de comprendre cette méthodologie afin de savoir l'utiliser	FAO	Côte d'Ivoire	AFRO-West		Male	40-49	MSc or equivalent	Expert national chargé de la nutrition	1				Paper							Yes		No		No		No		Strongly agree	Strongly agree			Strongly agree	Strongly agree			Agree	Agree		Strongly agree	Agree		No		it's very necessary	it's very necessary	it's very necessary	Agree
104	Impressive, everything is clear	No issues cited from my end	Wits Reproductive Health and HIV Institute, University of the Witwatersrand, Johannesburg, South Africa	South Africa	AFRO-East-South		Male	30-39	PhD or MD	Senior Researcher	1	1	1		Paper	Excellent	No	Clear and appropriate: for an open ended instrument	no	Besides only foods and drinks being listed-- the participant should be asked if for of the foods they shared or ate in a shared plate	Excellent	Yes		No		Yes	Am worried about facets like fat content etc. these we need to look with care as labeling in other African countries is limited: But this remains relevant to other foods that are labelled i.e. all fast foods in RSA are required to have nutritional info for their menus and food item	No		Agree	Agree		I think use of picture books in conjunction with 3D models of foods or household units could improve this process.	Agree	Agree		Actual household units in the interview--it will make it a bit longer-but better data	Agree	Agree		Agree	Agree		No		Impressive	Appropriate but more probing of specific questions setting specific is needed	it is extremely relevent	Strongly agree
405	The methodology is well described but need to be adapted in african context where measurements tools are aften different from what you used in this actual methodology. futhermore, you need to take account of different products consumed by poplulations but not complety identified and absent from our food compostion tables. Regardibg the use of suppelement, you know we have in Afrcia what we call d…	need to take account of diffrents kind of cooking especially for complex food which may differ from one counrty to another.	University of Ouagadougou/Biological, Food and NutritionalSciences Research Center (CRSBAN)	Burkina Faso	AFRO-West		Female	30-39	PhD or MD	Lecturer at Universiy of Ouagadougou	1	1		1	Paper	good but need according to afrcica context to check informations with identification paper since severals persons does not know their exact age and heigh.	employment or occupation which can be correlated to energy intake. But as you mentioned in the slide during presentation it should be open option where each country or project can adapt this information according to its own context/or to its research objectives.	well detailed and complete.	no changes for me and avoid to make longer the interview	The option other places of consumption is essential in Africa setting as we are frequently at different events (weddings, baptism, etc) where we eat on the same plate and it should be difficult to quantify the quantity we have eaten. we need to keep it on mind before evaluating the intake meal in term of quantity.	About e-worshop, the description is clearer for me. As I've commented above I don't know where we can insert food eaten at events or do we consider these food as fast food or street vendor?	Yes		No		No		Yes	traditional food and beuverages	Agree	Agree		presentations with local measurement as this kind of presentation is well accepted by our populations. Remember what the participant of Cote d'Ivoire shared with us regarding their last survey where they went in the field with photo of local measurement.	Agree	Disagree	In Africa we don't use the wine glass at all levels to drink some wine. We have local containers	If the software is attended to country use we acn leave the choice of household measures to each country who can adapt it according to the more useful containers or tools.	Agree	Agree		Agree	Agree		No		well dvelopped and help to check and add the missing information	well explained	It's essential to have this information that could help to explain the diet composition when calculated in terms of micronutrients and minerals content	Agree
101	This methodology is long overdue, the need for standardization of the methodologies for gathering dietary data in countries cannot be over-emphasized. Its exciting to see it happening	Are african foods (the common foods) already in the database of the software or each country has to update it with their specific foods?	National Horticultural Research Institute, Ibadan	Nigeria	AFRO-West		Female	30-39	PhD or MD	Researcher	1	1			Paper	Adequate. It captures the necessary background information that is required.		It is appropriate. Very relevant and helpful in getting all the foods eaten before going further to ask in-depth questions	None		Estimation of portion size in africa is a little different from that presented in the software. Containers used are different, people sometimes eat from the same plate.	Yes		Yes	In the estimation of portion size, there is need to add recognizable measures used in african countries e.g.milk tins, serving spoons	No		Yes	In situations where many people eat from a single plate, question should be asked about how many ate from the plate at each meal	Agree	Agree		More pictures of serving portions recognizable in the african context	Agree	Agree			Agree	Agree		Strongly agree	Strongly agree				Relevant and useful	Aequate	Relevant. Does this take care of herbal supplements commonly taken in Africa?	Neither agree or disagree
702	It will be interesting to learn how to actually administer the tool effectively without leading the respondent		University of Zimbabwe	Zimbabwe	AFRO-East-South		Female	30-39	MSc or equivalent	Lecturer	1	1	1		Paper	It is quite simple. In our settings unfortunately most do not know their height, but may have an idea of their weight. So we have to actually do those measurements.	Religion and denomination would help us also pick up if they are on a special diet. We have those who don't eat pork or meat because of religious beliefs.	Sounds simple enough	No	No	Its sounds simple, but in zimbabwe people use brand names of other good as an umbrella term for all other similar goods e.g Mazoe is an orange cordial but can be used to describe other cordials with other brand names. It often requires us to ask further questions to get the actual drink.	Yes				Yes	Most meals are prepared at home by a care giver and most men will not have an idea about whether it is fresh, fat content, brand names etc	No		Agree	Agree			Agree	Agree		Use the traditionally used utensils in the pictures	Neither agree or disagree	Neither agree or disagree		Agree	Agree		No		It helps to check if we are entering the right information before the respondent leaves.	It is relevant and can help to see if the respondent is really aware of the foods they are eating.	Helpful for some communities.	Agree
105	Overall, a smart tool. It however may need some minor adaptations for use in Africa.	None	None	Uganda	AFRO-East-South		Female	40-49	MSc or equivalent	NUtrition Assistant	1				Paper	Easy to follow and understand	Not at present. May have after the presentation on 21st.	A smart idea especially the bit of skipping 'sensitive foods' for the D/Q section.	No	Some, but probably best shared after the presentation in case they arose from a lack of clarity or misunderstanding.	It would be interesting seeing how applicable it is to the African context when more detail is provided.									Strongly agree			Perhaps use pictures of foods commonly consumed across Africa e.g. pounded maize May also need to depict HHMs commonly used in Africa e.g. 0.5L plastic cups	Strongly agree				Strongly agree			Strongly agree								Strongly agree
404	Interactive and intuitive method for 24HDR. Appears thorough with attention to detail for minimizing errors associated with recall	none	University of Alberta and Athabasca University	Canada/ Zimbabwe	AFRO-East-South		Female	30-39	PhD or MD	Research associate	1	1	1		Paper	This section asked all the necessary questions. Good attention to detail for identifying the correct recall day and also for the identifying special occasion (party, weekend etc)	No	The chronological approach for the quick list makes it intuitive and easy to answer and also easy to ask for the respondent. Using the quick list first to capture foods consumed with out the burden on the respondent to recall brands, cooking methods etc at that stage	No	No	Very thorough, allows for detailed description of foods identified in the quick list.	Yes		Yes	The food description may be more appropriate for urban African settings in some countries. In Zimbabwea describing foods may easier for those in urban settings who consume foods bought from supermarkets (therefore brand etc available) and tend not to consume food in shared dishes (easier quantification). In rural settings this might be more challenging	No		Yes	A facet to capture if the meal was consumed individually of as a shared dish	Strongly agree	Agree		More familiar food examples, in place of steak and muesli, use culturally appropriate foods e.g. porridge or corn meal (sadza- Zimbabwean staple).	Agree	Agree		Use of common household utensils, particularly those from a rural setting which may differ from urban areas	Agree	Disagree	Need for more familiar shapes, e.g. a circular shape is the typical way in which sadza is served, this would make more familiar to respondents	Agree	Agree		Yes	Use of hand size, e.g people describe having consumed a fist of sadza or a handful of vegetables	A good opportunity for the interviewer to cross check the information given and also to verify with the respondent that information is correct	Appropriate and follow standard 24HDR practise	Appropriate. However, may not be applicable in some African settings where supplements are not the norm	Agree
106	the two documents circulated provide clear and helpful background information; they highlight the strengths and challenges	Be clear about the distinction between errors and bias, which is not always clear and the implications are very important. Be clear about the need for the depth- particularly going forward perhaps to enable clarity on impact of processing and addition of fat,salt, sugar etc to products that are prepared away from home	University of Southampton	UK	Other	Europe	Male	>59	PhD or MD	Professor Public Health Nutrition	1	1	1	1	Paper	ok	no	ok			ok												Do these need to be altered to fit into local context?
607			World Health Organization	Congo	AFRO-Central		Female	50-59	PhD or MD	Nutrition Adviser	1	1	1	1	Paper	Concise and relevant	Maybe ask if they have any condition that determines their diet (here rather than later where this info is asked with regard to yesterday's consumption)	It is interesting. Before beginning this section, the interviewer could explain the interest in capturing everything consumed in the period of interest; then explain the structure of the interview: we shall begin by taking note in broad lines what you consumed at main meals and in-between and then got into more depth to collect info on specific foods/ingredients in the meals and snacks""	as above	I think so. Depending on the setting, people will not be able to give precise hours and minutes when they ate.	As a process very good. The reference categories are very much based on European market products, down to brands of yoghurt and muesli. they may be applicable in urban upper and middle class settings in Africa but outside that, i have doubts.	No		Yes		Yes		Yes		Agree	Neither agree or disagree		African staples (and there are so many that i think they will have to be country-specific)	Agree	Neither agree or disagree		need to have some pictures utensils used locally, certainly not those wine (?) glasses!	Neither agree or disagree	Neither agree or disagree		Agree	Agree				Good	Good	Good, though in the demo, i did not see the interviewer record anywhere that the guy said he took some supplement	Agree
204	Good and clear methodology. There is a list of foods which are already defined in the program. This is a strengh for the Globodiet methodology because missing data will be minimized. However, this methodology is not adapted to african specific foods. Foods quantification methods, facets, brands and recipes also need to be adapted.	African foods should be included. I suggest to use pictures instead of scale for quantification of foods. I need clarifications an the calculation of the foods intakes. Does the software evaluate macronutrients intakes only ? What about vitamins and minerals?	Université Félix Houphouët Boigny	Côte d'Ivoire	AFRO-West		Female	40-49	PhD or MD	Lecturer and researcher	1	1		1	Paper	information section is brief.	Country, Town, Neighbourhood Level of education	Not adapted to african foods and beverages.	Yes. We may use more pictures for quantification in the context of Africa. In some cases (e.g. porridges, stews), the serving sets for quantification are need to be identified in each country.	Yes	Well done because it's detailed. Information can not be missed.	No	Food description must be adapted to african food. It's must be more specific for african foods.	No		Yes	For african foods, some facets won't be necessary as we have not the same ingredients or recipes as in europe. Brands description will not be always easy in the African context. Furthermore, Brands are sometimes different from a country to another.	No		Strongly agree	Strongly agree		For some specific foods (e.g pounded yam), we need to show balls of the product. Pictures of bread should be looked closely because we have french bread (baguette, pain de campagne...) which are most consumed in some countries as Senegal, Côte d'ivoire...	Strongly agree	Agree		For water, coffea and tea, it's better to use pictures ifor quantification instead of scale because many people in African have a low level of education. Stews, porridges, cereals and cassava-based pastes are also much consumed and served in specific sets in Africa. These sets must be considered for pictures of the household measures.	Strongly agree	Strongly agree		Strongly agree	Strongly agree		No		Good. It gives the possibility to add information or to make correction.	Good. It allows to add forgotten items. It is interessant that it's open; the interviewer can add any items cited after.	Dietary supplements found in each country should be added to the list. Their quantification should also be adapted to the countr context.	Agree
202	No comment	No comment	Ministry if Health	Morocco	EMRO		Female	30-39	MSc or equivalent	nutritionist at the Nutrition Department of the Ministry of Health	1	1	1	1	Paper	it is incomplete	I think that the following information are important in the general information section: Origin or place of residence marital status number of children education occupation Physical activity only Breasfeeding or no Date of stopped breasfeeding	the list is very well developed but is not responding to the African context	Changes in local foods and menus according to the African context	I think we need to refer to African food habits with the use of nutritional basic tools such as tables of food composition and culinary books	It is very well designed but is not responding to the African context	No	The menus are different in the African context, the dishes are a little complicated because there are a lot of ingredients in one dish	Yes	spices Tangia pastilla rfissa kedid meat or tripe containing dried offal galette specific to each African country ...	No		Yes	dishes and utensils	Agree	Agree		all pictures can be adapted to the African context, it remains to define the ingredients of African cuisine	Agree	Agree		all pictures can be adapted to the African context, it remains to define the ingredients of African cuisine	Agree	Agree		Agree	Agree		Yes	the bowl for harira the dish to prepare couscous tajine tea glass	nothing to report	nothing to report	nothing to report	Agree
[truncated: 26 more columns]
