# Supplementary material for: Evaluation of the international standardized 24-h dietary recall methodology (GloboDiet) for potential application in research and surveillance within African settings
Source: Global Health. 2017 Jun 19;13:35. doi: 10.1186/s12992-017-0260-6 (PMC5477249; doi:10.1186/s12992-017-0260-6)
Supplement: Supplementary file 3 — Evaluation questionnaire in French. (PDF 145 kb) [file 12992_2017_260_MOESM3_ESM.pdf]

## EVALUATION DE GLOBODIET PAR DES EXPERTS AFRICAINS ET INTERNATIONAUX

| Identification                                                                                                                                                                                                                                                                                                                                                                                                                                                                                  |                                                                                                                                                                                                                                                                                                                                       |
|-------------------------------------------------------------------------------------------------------------------------------------------------------------------------------------------------------------------------------------------------------------------------------------------------------------------------------------------------------------------------------------------------------------------------------------------------------------------------------------------------|---------------------------------------------------------------------------------------------------------------------------------------------------------------------------------------------------------------------------------------------------------------------------------------------------------------------------------------|
| <p>Nom :</p> <p>Prénoms :</p> <p>1. Institution:</p><br><br><br><br><br><br><br><p>2. Pays:</p> <p>3. Région OMS:</p> <div style="display: flex; justify-content: space-between;"> <div> <input type="checkbox"/><sub>1</sub> EMRO<br/> <input type="checkbox"/><sub>3</sub> AFRO-centrale                 </div> <div> <input type="checkbox"/><sub>2</sub> AFRO-Ouest<br/> <input type="checkbox"/><sub>4</sub> AFRO-Est-Sud                 </div> </div>                                    | <div style="text-align: center; margin-bottom: 20px;"> <div style="border: 1px solid black; width: 30px; height: 30px; margin: 0 auto;"></div> <div style="border: 1px solid black; width: 30px; height: 30px; margin: 0 auto;"></div> <div style="border: 1px solid black; width: 30px; height: 30px; margin: 0 auto;"></div> </div> |
| Informations sociodémographiques                                                                                                                                                                                                                                                                                                                                                                                                                                                                |                                                                                                                                                                                                                                                                                                                                       |
| <p>4. Sexe</p> <div style="display: flex; justify-content: space-around;"> <input type="checkbox"/><sub>1</sub> Homme                 <input type="checkbox"/><sub>2</sub> Femme             </div>                                                                                                                                                                                                                                                                                             | <div style="border: 1px solid black; width: 30px; height: 30px; margin: 0 auto;"></div>                                                                                                                                                                                                                                               |
| <p>5. Classe d'âge (années)</p> <div style="display: flex; justify-content: space-around;"> <div> <input type="checkbox"/><sub>1</sub> 20-29<br/> <input type="checkbox"/><sub>4</sub> 50-59                 </div> <div> <input type="checkbox"/><sub>2</sub> 30-39<br/> <input type="checkbox"/><sub>5</sub> ≥60                 </div> <div> <input type="checkbox"/><sub>3</sub> 40-49                 </div> </div>                                                                        | <div style="border: 1px solid black; width: 30px; height: 30px; margin: 0 auto;"></div>                                                                                                                                                                                                                                               |
| <p>6. Education:</p> <div style="display: flex; justify-content: space-around;"> <div> <input type="checkbox"/><sub>1</sub> Niveau A<br/>                     équivalent <input type="checkbox"/><sub>4</sub> Doctorat                 </div> <div> <input type="checkbox"/><sub>2</sub> Licence ou équivalent                 </div> <div> <input type="checkbox"/><sub>3</sub> Master ou                 </div> </div>                                                                        | <div style="border: 1px solid black; width: 30px; height: 30px; margin: 0 auto;"></div>                                                                                                                                                                                                                                               |
| <p>7. Occupation :</p>                                                                                                                                                                                                                                                                                                                                                                                                                                                                          | <div style="border: 1px solid black; width: 30px; height: 30px; margin: 0 auto;"></div>                                                                                                                                                                                                                                               |
| <p>8. Avec quels types de méthodes de consommation alimentaire êtes-vous familier?<br/>(que vous avez déjà utilisé ?)</p> <div style="display: flex; justify-content: space-around;"> <input type="checkbox"/><sub>1</sub> Rappel de 24 h                 <input type="checkbox"/><sub>2</sub> Fréquencier                 <input type="checkbox"/><sub>3</sub> Enregistrements alimentaires                 <input type="checkbox"/><sub>4</sub> Historique de consommation             </div> | <div style="border: 1px solid black; width: 30px; height: 30px; margin: 0 auto;"></div>                                                                                                                                                                                                                                               |
| <p>9. Pour la méthode de consommation alimentaire que vous utilisez, quel était le support principal ?</p> <div style="display: flex; justify-content: space-around;"> <input type="checkbox"/><sub>1</sub> papier                 <input type="checkbox"/><sub>2</sub> ordinateur                 <input type="checkbox"/><sub>3</sub> Internet                 <input type="checkbox"/><sub>4</sub> tablette             </div>                                                               | <div style="border: 1px solid black; width: 30px; height: 30px; margin: 0 auto;"></div>                                                                                                                                                                                                                                               |

| <b>General Information (Information Générale)</b>                                |
|----------------------------------------------------------------------------------|
| 10. Que pensez-vous de la section –General information?                          |
| 11. Y-a-il une information supplémentaire pertinente que vous voudriez suggérer? |

| <b>Quick list (Liste rapide)</b>                                                           |
|--------------------------------------------------------------------------------------------|
| 12. Que pensez-vous de la section – quick list?                                            |
| 13. Y-a-il de possibles modifications susceptibles d'améliorer cette section ?             |
| 14. Existe-t-il de possibles modifications pour adapter la –quick list- au cadre Africain? |

| Description et Quantification                                                                                                                                                                                                            |                            |                            |                            |                            |                                                                                                              |
|------------------------------------------------------------------------------------------------------------------------------------------------------------------------------------------------------------------------------------------|----------------------------|----------------------------|----------------------------|----------------------------|--------------------------------------------------------------------------------------------------------------|
| 15. Que pensez-vous de la description des aliments?                                                                                                                                                                                      |                            |                            |                            |                            | <input type="checkbox"/><br><input type="checkbox"/><br><input type="checkbox"/><br><input type="checkbox"/> |
| 16. La description des aliments est-elle adaptée au contexte Africain ?<br><input type="checkbox"/> Non <input type="checkbox"/> Oui<br><br><b>Si non</b> , Pouvez-vous préciser pourquoi?                                               |                            |                            |                            |                            | <input type="checkbox"/><br><input type="checkbox"/><br><input type="checkbox"/>                             |
| 17. Y-at-il un critère de description des aliments non énuméré et pourrait être pertinent dans le contexte africain ?<br><input type="checkbox"/> Non <input type="checkbox"/> Oui<br><br><b>Si Oui</b> , Pouvez-vous préciser pourquoi? |                            |                            |                            |                            | <input type="checkbox"/><br><input type="checkbox"/><br><input type="checkbox"/>                             |
| 18. Y-at-il des facettes de description qui ne sont pas applicables dans le contexte Africain ?<br><input type="checkbox"/> Non <input type="checkbox"/> Oui<br><br><b>Si oui</b> , Pouvez-vous préciser lesquels?                       |                            |                            |                            |                            | <input type="checkbox"/><br><input type="checkbox"/><br><input type="checkbox"/>                             |
| 19. Y-a-il des facettes non énumérées, mais qui pourraient être applicables dans le contexte Africain ?<br><input type="checkbox"/> Non <input type="checkbox"/> Oui<br><br><b>Si oui</b> , Pouvez-vous préciser pourquoi?               |                            |                            |                            |                            | <input type="checkbox"/><br><input type="checkbox"/><br><input type="checkbox"/>                             |
| 20. Comment évaluez-vous les photos des aliments pour l'interview face-à-face ? C'est :                                                                                                                                                  |                            |                            |                            |                            |                                                                                                              |
|                                                                                                                                                                                                                                          | Très vrai                  | Vrai                       | Ni vrai<br>Ni faux         | Faux                       | Très faux                                                                                                    |
| Pratique à utiliser                                                                                                                                                                                                                      | <input type="checkbox"/> 1 | <input type="checkbox"/> 2 | <input type="checkbox"/> 3 | <input type="checkbox"/> 4 | <input type="checkbox"/> 5                                                                                   |
| Applicable dans le contexte africain                                                                                                                                                                                                     | <input type="checkbox"/> 1 | <input type="checkbox"/> 2 | <input type="checkbox"/> 3 | <input type="checkbox"/> 4 | <input type="checkbox"/> 5                                                                                   |
| 21. Si vous pensez que l'utilisation des photos des aliments n'est pas applicable dans le contexte Africain, pouvez-vous préciser pourquoi?                                                                                              |                            |                            |                            |                            | <input type="checkbox"/><br><input type="checkbox"/><br><input type="checkbox"/>                             |

|                                                                                                                                                                                                                                                   |                                       |                                       |                                       |                                       |                                                                                  |
|---------------------------------------------------------------------------------------------------------------------------------------------------------------------------------------------------------------------------------------------------|---------------------------------------|---------------------------------------|---------------------------------------|---------------------------------------|----------------------------------------------------------------------------------|
| 22. Quelle suggestions pour améliorer les photos des aliments, pensez-vous pour mieux l'adapter au contexte africain?                                                                                                                             |                                       |                                       |                                       |                                       | <input type="checkbox"/><br><input type="checkbox"/><br><input type="checkbox"/> |
| 23. Comment évaluez-vous les photos des <b>mesures ménagères</b> pour l'interview face-à-face? C'est :                                                                                                                                            |                                       |                                       |                                       |                                       |                                                                                  |
|                                                                                                                                                                                                                                                   | Très vrai                             | Vrai                                  | Ni vrai<br>Ni faux                    | Faux                                  | Très faux                                                                        |
| Pratique à utiliser                                                                                                                                                                                                                               | <input type="checkbox"/> <sub>1</sub> | <input type="checkbox"/> <sub>2</sub> | <input type="checkbox"/> <sub>3</sub> | <input type="checkbox"/> <sub>4</sub> | <input type="checkbox"/> <sub>5</sub>                                            |
| Applicable dans le contexte africain                                                                                                                                                                                                              | <input type="checkbox"/> <sub>1</sub> | <input type="checkbox"/> <sub>2</sub> | <input type="checkbox"/> <sub>3</sub> | <input type="checkbox"/> <sub>4</sub> | <input type="checkbox"/> <sub>5</sub>                                            |
| 24. Si vous pensez que les photos des <b>mesures ménagères</b> ne sont pas applicables dans le contexte africain, pouvez-vous préciser pourquoi?                                                                                                  |                                       |                                       |                                       |                                       | <input type="checkbox"/><br><input type="checkbox"/><br><input type="checkbox"/> |
| 25. A quelles adaptations des photos des mesures ménagères pensez-vous pour mieux l'adapter au contexte Africain?                                                                                                                                 |                                       |                                       |                                       |                                       | <input type="checkbox"/><br><input type="checkbox"/><br><input type="checkbox"/> |
| 26. Comment évaluez-vous la quantification par <b>les formes</b> pour l'interview face-à-face ? C'est                                                                                                                                             |                                       |                                       |                                       |                                       |                                                                                  |
|                                                                                                                                                                                                                                                   | Très vrai                             | Vrai                                  | Ni vrai<br>Ni faux                    | Faux                                  | Très faux                                                                        |
| Pratique à utiliser                                                                                                                                                                                                                               | <input type="checkbox"/> <sub>1</sub> | <input type="checkbox"/> <sub>2</sub> | <input type="checkbox"/> <sub>3</sub> | <input type="checkbox"/> <sub>4</sub> | <input type="checkbox"/> <sub>5</sub>                                            |
| Applicable dans le contexte africain                                                                                                                                                                                                              | <input type="checkbox"/> <sub>1</sub> | <input type="checkbox"/> <sub>2</sub> | <input type="checkbox"/> <sub>3</sub> | <input type="checkbox"/> <sub>4</sub> | <input type="checkbox"/> <sub>5</sub>                                            |
| 27. Si vous pensez que la quantification par <b>les formes</b> n'est pas applicable au contexte Africain, pouvez-vous préciser pourquoi?                                                                                                          |                                       |                                       |                                       |                                       | <input type="checkbox"/><br><input type="checkbox"/><br><input type="checkbox"/> |
| 28. Comment évaluez-vous l'utilisation des <b>unités standards</b> (Ex: une banana, une cannette, un sachet de chips, ...) comme méthode de quantification pour l'interview face-à-face?                                                          |                                       |                                       |                                       |                                       |                                                                                  |
|                                                                                                                                                                                                                                                   | Très vrai                             | Vrai                                  | Ni vrai<br>Ni faux                    | Faux                                  | Très faux                                                                        |
| Pratique à utiliser                                                                                                                                                                                                                               | <input type="checkbox"/> <sub>1</sub> | <input type="checkbox"/> <sub>2</sub> | <input type="checkbox"/> <sub>3</sub> | <input type="checkbox"/> <sub>4</sub> | <input type="checkbox"/> <sub>5</sub>                                            |
| Applicable dans le contexte africain                                                                                                                                                                                                              | <input type="checkbox"/> <sub>1</sub> | <input type="checkbox"/> <sub>2</sub> | <input type="checkbox"/> <sub>3</sub> | <input type="checkbox"/> <sub>4</sub> | <input type="checkbox"/> <sub>5</sub>                                            |
| 29. Si vous pensez que les <b>unités standards</b> comme méthode de quantification ne sont pas applicables au contexte africain, pouvez-vous préciser pourquoi?                                                                                   |                                       |                                       |                                       |                                       | <input type="checkbox"/><br><input type="checkbox"/><br><input type="checkbox"/> |
| 30. Y-at-il une autre méthode de quantification utilisable ou pertinent dans le contexte Africain qui n'est pas prise en compte par le logiciel GloboDiet?<br><input type="checkbox"/> <sub>0</sub> Non <input type="checkbox"/> <sub>1</sub> Oui |                                       |                                       |                                       |                                       | <input type="checkbox"/><br><input type="checkbox"/><br><input type="checkbox"/> |
| Si oui, Pouvez-vous préciser?                                                                                                                                                                                                                     |                                       |                                       |                                       |                                       | <input type="checkbox"/><br><input type="checkbox"/><br><input type="checkbox"/> |

| Overall controls (Contrôle généraux)                                   |                                                                    |
|------------------------------------------------------------------------|--------------------------------------------------------------------|
| 31. Que pensez-vous de la section -overall controls-?                  | <div><div></div><div></div><div></div></div>                       |
| 32. Que pensez-vous des questions de vérification (probing questions)? | <div><div></div><div></div><div></div><div></div><div></div></div> |

| Dietary supplements (Compléments alimentaires)               |                                                                                                             |
|--------------------------------------------------------------|-------------------------------------------------------------------------------------------------------------|
| 33. Que pensez-vous de la section compléments alimentaires ? | <div><input type="checkbox"/></div> <div><input type="checkbox"/></div> <div><input type="checkbox"/></div> |

| Evaluation générale du logiciel                                                                                                                                                               |                                       |                                       |                                       |                                       |                                                                      |
|-----------------------------------------------------------------------------------------------------------------------------------------------------------------------------------------------|---------------------------------------|---------------------------------------|---------------------------------------|---------------------------------------|----------------------------------------------------------------------|
| 1. Comment évaluez-vous la réalisation d'un entretien rappel 24h en utilisant un logiciel sur ordinateur ? Pensez-vous que c'est :                                                            |                                       |                                       |                                       |                                       |                                                                      |
|                                                                                                                                                                                               | Très vrai                             | Vrai                                  | Ni vrai<br>Ni faux                    | Faux                                  | Très faux                                                            |
| Faisable                                                                                                                                                                                      | <input type="checkbox"/> <sub>1</sub> | <input type="checkbox"/> <sub>2</sub> | <input type="checkbox"/> <sub>3</sub> | <input type="checkbox"/> <sub>4</sub> | <input type="checkbox"/> <sub>5</sub>                                |
| Pratique                                                                                                                                                                                      | <input type="checkbox"/> <sub>1</sub> | <input type="checkbox"/> <sub>2</sub> | <input type="checkbox"/> <sub>3</sub> | <input type="checkbox"/> <sub>4</sub> | <input type="checkbox"/> <sub>5</sub>                                |
| Efficace                                                                                                                                                                                      | <input type="checkbox"/> <sub>1</sub> | <input type="checkbox"/> <sub>2</sub> | <input type="checkbox"/> <sub>3</sub> | <input type="checkbox"/> <sub>4</sub> | <input type="checkbox"/> <sub>5</sub>                                |
| Acceptable (durée)                                                                                                                                                                            | <input type="checkbox"/> <sub>1</sub> | <input type="checkbox"/> <sub>2</sub> | <input type="checkbox"/> <sub>3</sub> | <input type="checkbox"/> <sub>4</sub> | <input type="checkbox"/> <sub>5</sub>                                |
| Pas adapté au cadre<br>Africain                                                                                                                                                               | <input type="checkbox"/> <sub>1</sub> | <input type="checkbox"/> <sub>2</sub> | <input type="checkbox"/> <sub>3</sub> | <input type="checkbox"/> <sub>4</sub> | <input type="checkbox"/> <sub>5</sub>                                |
| 2. Si vous pensez que l'entretien face-à-face n'est pas adapté au contexte Africain, pouvez-vous préciser pourquoi?                                                                           |                                       |                                       |                                       |                                       | <input type="text"/><br><input type="text"/><br><input type="text"/> |
| 3. Comment évaluez-vous l'utilisation d'un logiciel pour l'enregistrement des données des consommations alimentaires pour les jeunes enfants et les personnes âgées ? Pensez-vous que c'est : |                                       |                                       |                                       |                                       |                                                                      |
|                                                                                                                                                                                               | Très vrai                             | Vrai                                  | Ni vrai<br>Ni faux                    | Faux                                  | Très faux                                                            |
| Faisable                                                                                                                                                                                      | <input type="checkbox"/> <sub>1</sub> | <input type="checkbox"/> <sub>2</sub> | <input type="checkbox"/> <sub>3</sub> | <input type="checkbox"/> <sub>4</sub> | <input type="checkbox"/> <sub>5</sub>                                |
| Pratique                                                                                                                                                                                      | <input type="checkbox"/> <sub>1</sub> | <input type="checkbox"/> <sub>2</sub> | <input type="checkbox"/> <sub>3</sub> | <input type="checkbox"/> <sub>4</sub> | <input type="checkbox"/> <sub>5</sub>                                |
| Efficace                                                                                                                                                                                      | <input type="checkbox"/> <sub>1</sub> | <input type="checkbox"/> <sub>2</sub> | <input type="checkbox"/> <sub>3</sub> | <input type="checkbox"/> <sub>4</sub> | <input type="checkbox"/> <sub>5</sub>                                |
| Acceptable (durée)                                                                                                                                                                            | <input type="checkbox"/> <sub>1</sub> | <input type="checkbox"/> <sub>2</sub> | <input type="checkbox"/> <sub>3</sub> | <input type="checkbox"/> <sub>4</sub> | <input type="checkbox"/> <sub>5</sub>                                |
| Pas adapté au cadre<br>Africain                                                                                                                                                               | <input type="checkbox"/> <sub>1</sub> | <input type="checkbox"/> <sub>2</sub> | <input type="checkbox"/> <sub>3</sub> | <input type="checkbox"/> <sub>4</sub> | <input type="checkbox"/> <sub>5</sub>                                |
| 4. Si vous pensez que l'interview face-à-face n'est pas adapté au contexte Africain, pouvez-vous préciser pourquoi?                                                                           |                                       |                                       |                                       |                                       | <input type="text"/><br><input type="text"/><br><input type="text"/> |
| 5. Comment évaluez-vous le logiciel GloboDiet pour la réalisation d'un rappel de 24h? C'est :                                                                                                 |                                       |                                       |                                       |                                       |                                                                      |
|                                                                                                                                                                                               | Très vrai                             | Vrai                                  | Ni vrai<br>Ni faux                    | Faux                                  | Très faux                                                            |
| Facile à utiliser                                                                                                                                                                             | <input type="checkbox"/> <sub>1</sub> | <input type="checkbox"/> <sub>2</sub> | <input type="checkbox"/> <sub>3</sub> | <input type="checkbox"/> <sub>4</sub> | <input type="checkbox"/> <sub>5</sub>                                |
| Compréhensible                                                                                                                                                                                | <input type="checkbox"/> <sub>1</sub> | <input type="checkbox"/> <sub>2</sub> | <input type="checkbox"/> <sub>3</sub> | <input type="checkbox"/> <sub>4</sub> | <input type="checkbox"/> <sub>5</sub>                                |
| Complet                                                                                                                                                                                       | <input type="checkbox"/> <sub>1</sub> | <input type="checkbox"/> <sub>2</sub> | <input type="checkbox"/> <sub>3</sub> | <input type="checkbox"/> <sub>4</sub> | <input type="checkbox"/> <sub>5</sub>                                |
| Complexe                                                                                                                                                                                      | <input type="checkbox"/> <sub>1</sub> | <input type="checkbox"/> <sub>2</sub> | <input type="checkbox"/> <sub>3</sub> | <input type="checkbox"/> <sub>4</sub> | <input type="checkbox"/> <sub>5</sub>                                |
| Pas adapté au cadre<br>Africain                                                                                                                                                               | <input type="checkbox"/> <sub>1</sub> | <input type="checkbox"/> <sub>2</sub> | <input type="checkbox"/> <sub>3</sub> | <input type="checkbox"/> <sub>4</sub> | <input type="checkbox"/> <sub>5</sub>                                |
| 6. Si vous pensez que le logiciel n'est pas adapté au contexte Africain, pouvez-vous préciser pourquoi ?                                                                                      |                                       |                                       |                                       |                                       | <input type="text"/><br><input type="text"/><br><input type="text"/> |
| 7. Comment évaluez l'utilisation d'un logiciel installé sur ordinateur, avec entretien face-à-face pour évaluer la consommation alimentaire ?                                                 |                                       |                                       |                                       |                                       |                                                                      |
|                                                                                                                                                                                               | Très vrai                             | Vrai                                  | Ni vrai<br>Ni faux                    | Faux                                  | Très faux                                                            |
| Faisable                                                                                                                                                                                      | <input type="checkbox"/> <sub>1</sub> | <input type="checkbox"/> <sub>2</sub> | <input type="checkbox"/> <sub>3</sub> | <input type="checkbox"/> <sub>4</sub> | <input type="checkbox"/> <sub>5</sub>                                |

|                                                                                                                     |                                       |                                       |                                       |                                       |                                                                                                 |
|---------------------------------------------------------------------------------------------------------------------|---------------------------------------|---------------------------------------|---------------------------------------|---------------------------------------|-------------------------------------------------------------------------------------------------|
| Pratique                                                                                                            | <input type="checkbox"/> <sub>1</sub> | <input type="checkbox"/> <sub>2</sub> | <input type="checkbox"/> <sub>3</sub> | <input type="checkbox"/> <sub>4</sub> | <input type="checkbox"/> <sub>5</sub>                                                           |
| Adapté au contexte<br>Africain                                                                                      | <input type="checkbox"/> <sub>1</sub> | <input type="checkbox"/> <sub>2</sub> | <input type="checkbox"/> <sub>3</sub> | <input type="checkbox"/> <sub>4</sub> | <input type="checkbox"/> <sub>5</sub>                                                           |
| 8. Si vous pensez que l'entretien face-à-face n'est pas adapté au contexte Africain, pouvez-vous préciser pourquoi? |                                       |                                       |                                       |                                       | <div><input type="text"/></div> <div><input type="text"/></div> <div><input type="text"/></div> |
